# Supplementary material
Source: PubMed Central journal article supplement (PMC6929323)
Supplement: NIHMS1545122-supplement-1.pdf [file NIHMS1545122-supplement-1.pdf]

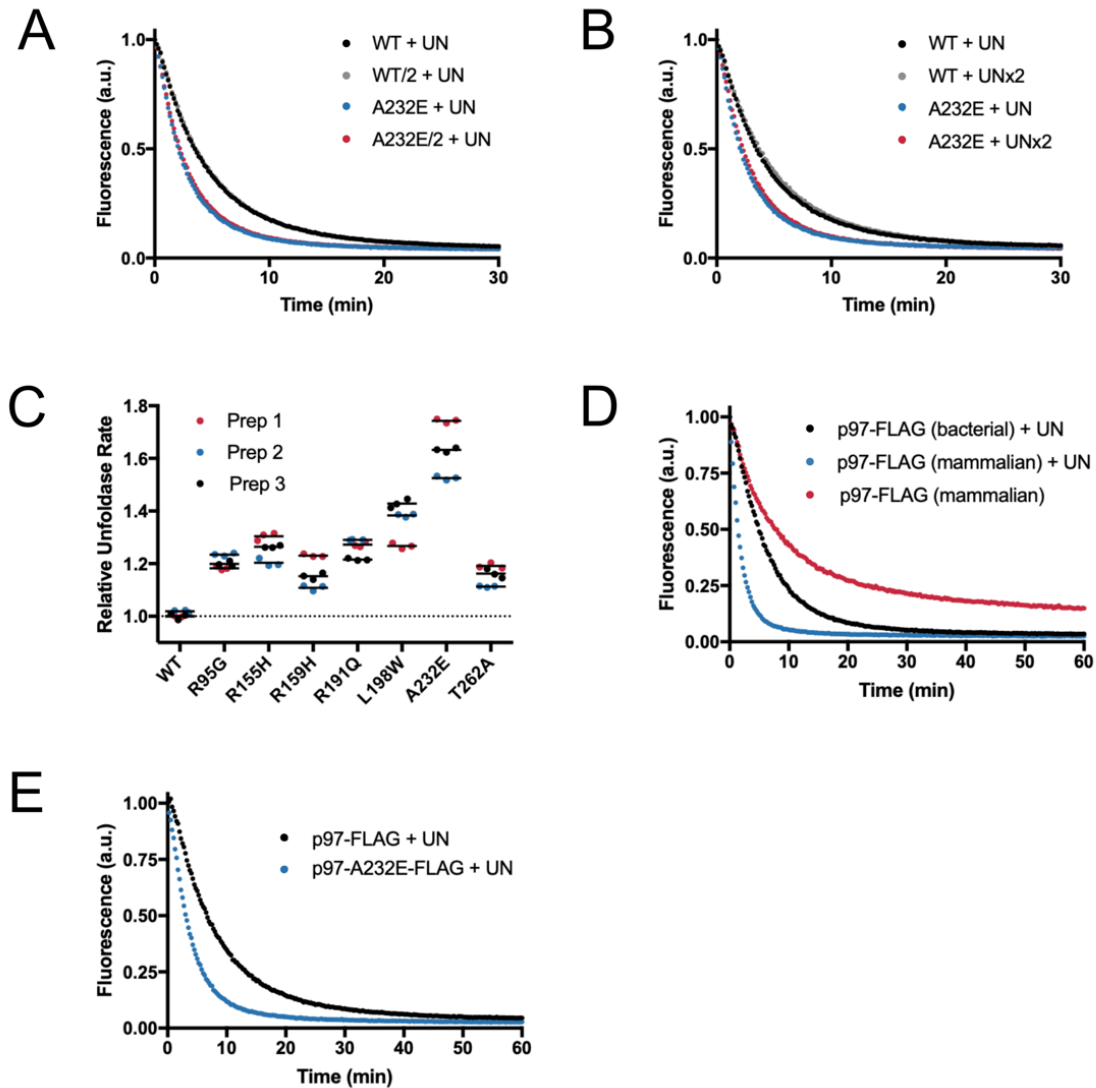

**Figure S1. Related to Figure 1. (A)** Example time courses of unfolding of split mEos3.2 show little change in normalized rate when the concentration of p97 is halved (WT:  $0.985 \pm 0.005$ , p97-A232E:  $0.937 \pm 0.006$ ). **(B)** Example time courses show little change in normalized rate when UN is doubled (WT:  $0.927 \pm 0.002$ , p97-A232E:  $0.93 \pm 0.01$ ). **(C)** Prep-to-prep variability in the unfoldase rates of MSP-mutant p97. All MSP mutants showed increased unfoldase rates compared to wild type yet with considerable prep-to-prep variabilities. For Preps 1 and 2, assays were carried out in a modified assay buffer under slightly different conditions (see Methods), and substrate-unfoldase rates were normalized to that of wild-type p97 Prep 1. The rates for the Prep 3 are replotted from Figure 1C. **(D)** Example mEos3.2 substrate-unfolding traces show that human cell-line expressed p97 in complex with UN (blue trace) is a faster unfoldase than *E. coli*-expressed p97-UN (black trace) and can promote unfolding even without the addition of exogenous UN (red trace). **(E)** Example unfolding traces show human cell-line expressed p97-A232E unfolds substrate faster than similarly expressed wild-type p97. Representative traces shown. Technical replicates,  $n \geq 2$ ,  $\pm$  S.D..

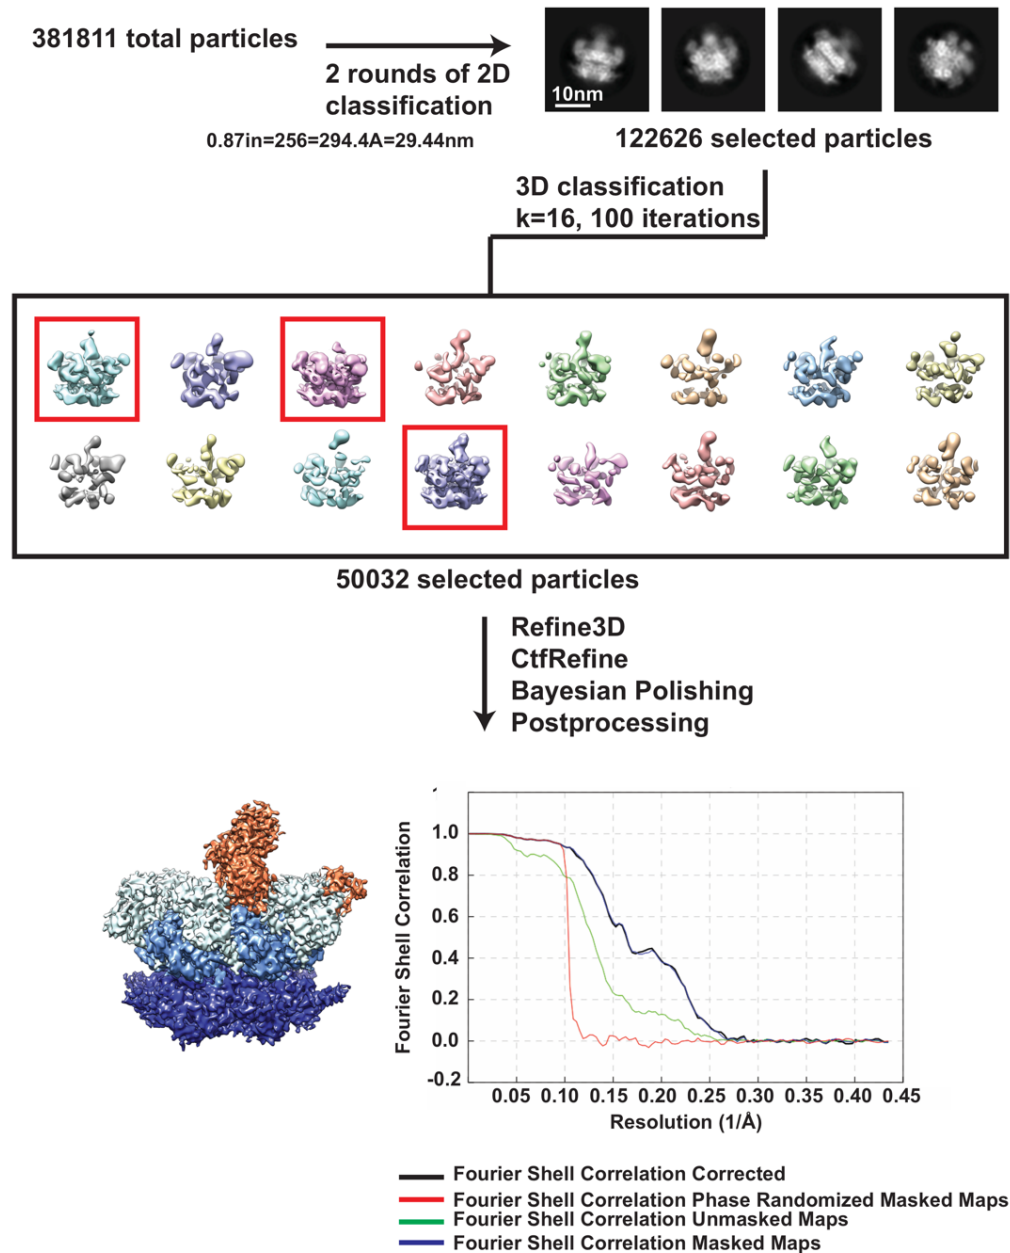

**Figure S2. Related to Figure 3.** Analysis and cryo-EM processing of the p97-A232E:UN-ATP complex. Total particles of p97-A232E:UN-ATP complex dataset were subjected to two rounds of reference-free 2D class averages to clean out contamination or bad particles, followed by a 3D classification into 16 classes. The three best classes of particles were selected from the total 16 classes (red box), resulting in a final dataset of 50,032 particles. This particle stack was refined with CtfRefinement, Bayesian polishing, and post-processing, resulting in a final resolution of 4.26Å, evaluated using gold standard FSC curves of the masked and unmasked post-processed final reconstructions (Scheres, 2012). The final map is colored by domains: NPLOC4 (orange), NTDs (light blue), D1 (sky blue), D2 (navy blue).

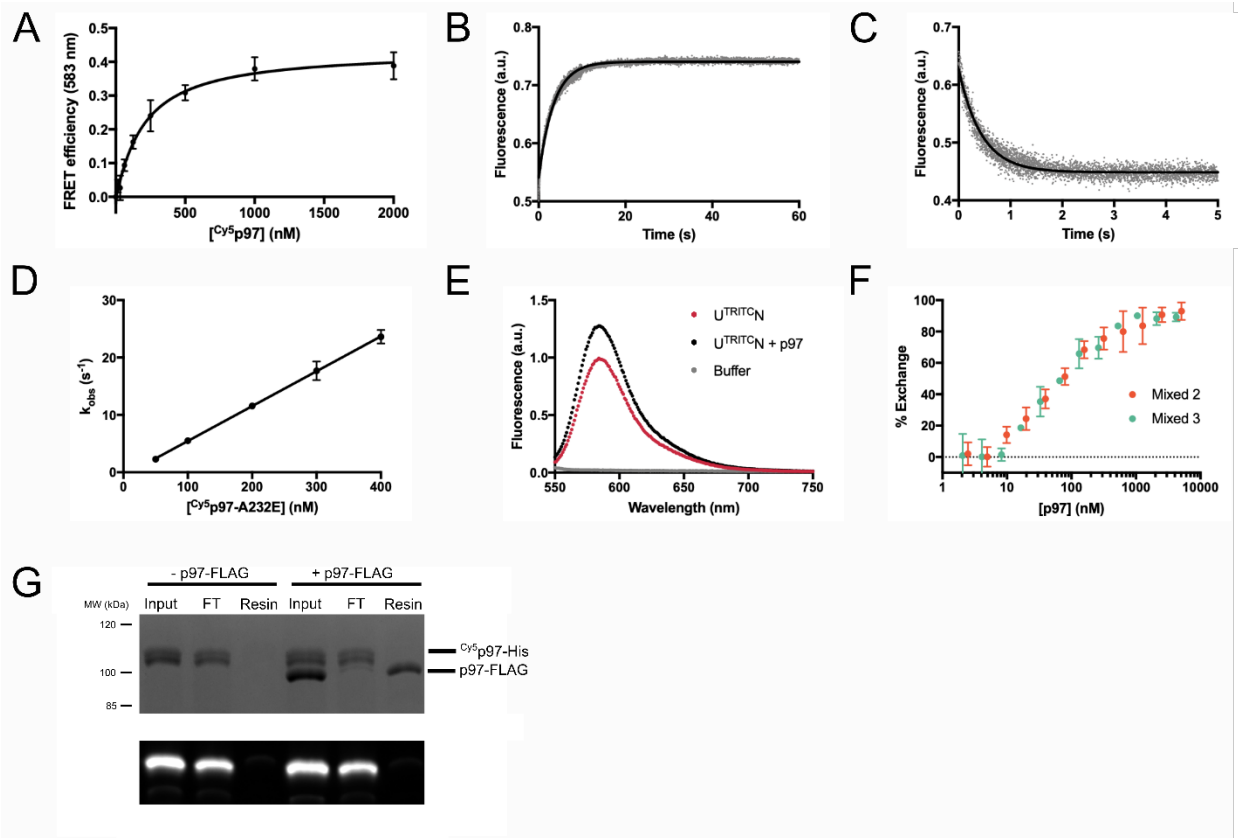

**Figure S3. Related to Figure 5 and Table 1.** (A) Example FRET-based binding curve for the interaction of  $U^{TRITCN}$  with variable concentrations of  $Cy5p97$  in ATPyS. Data were fit to a quadratic binding equation (technical replicates,  $N = 3$ ,  $\pm$  S.D.). (B) Example trace and single-exponential fit for the dissociation of  $U^{TRITCN}$  from  $Cy5p97$  in ATPyS, measured by the recovery of donor TRITC fluorescence after stopped-flow mixing. (C) Example trace and single-exponential fit for the binding of  $U^{TRITCN}$  to  $Cy5p97$  in ATPyS, measured by the quenching of donor TRITC fluorescence after stopped-flow mixing. (D) Shown are the observed rate constants  $k_{obs}$  for the association of  $U^{TRITCN}$  with  $Cy5p97$ -A232E in ATPyS, derived from single-exponential fits of binding kinetics at various  $Cy5p97$ -A232E concentrations. The association rate constant,  $k_{on}$ , was determined by linear regression (technical replicates,  $N \geq 5$ ,  $\pm$  S.D.). (E)  $U^{TRITCN}$  fluorescence (red, 50 nM) is sensitive to binding of unlabeled p97 (black, 2.5  $\mu$ M). (F) Competition FRET experiment, monitoring the dissociation of  $U^{TRITCN}$  from  $Cy5$ -labeled p97-A232E and binding to excess unlabeled Mixed 2 and Mixed 3 heterohexamers, show that the mixed heterohexamers have similar UN affinities (technical replicates,  $N \geq 2$ ,  $\pm$  S.D.). (G) Protomer exchange between p97 hexamers is slow. Coomassie stain and fluorescence scan of an SDS-PAGE gel show no evidence of His-tagged  $Cy5p97$  binding to the anti-FLAG resin despite robust binding of FLAG-tagged p97.

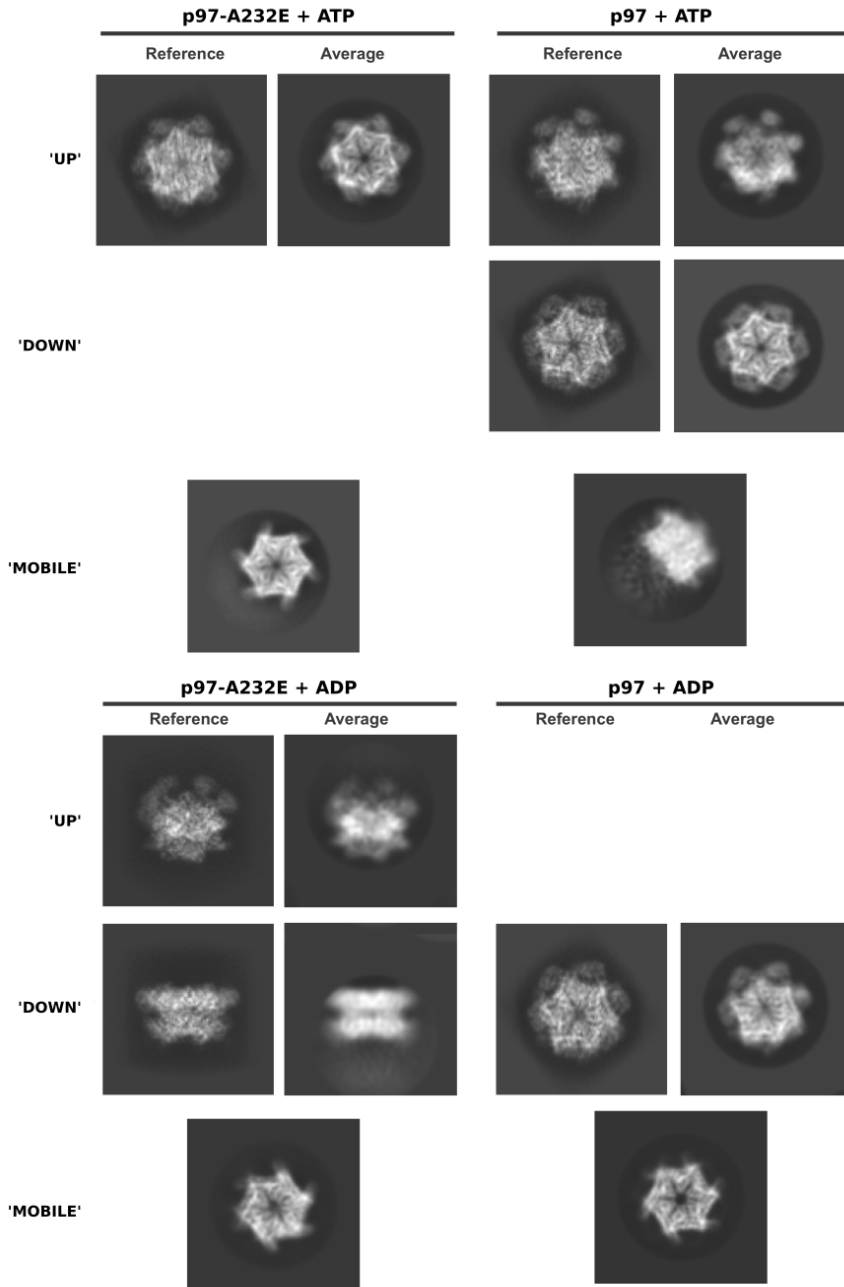

**Figure S4: Related to Figure 6.** Representative 2D class averages of nucleotide datasets, compared to back projections of 3D models. Back projections of the 3D models for p97-ATP $\gamma$ S (EMD:3297) and p97-ADP (EMD:3299) (Banerjee et al., 2016) next to a representative 2D class average from each nucleotide dataset, oriented in the same angle. Representative averages are also shown for hexamers with 'mobile' NTDs.

|                             | p97-A232E-UN:ATP | p97-ATP       | p97-A232E-ATP | p97-ADP | p97-A232E-ADP |
|-----------------------------|------------------|---------------|---------------|---------|---------------|
| <b>Microscope</b>           | Titan Krios      | Talos Arctica |               |         |               |
| <b>Nominal Mag.</b>         | 33,333x          | 43,860x       |               |         |               |
| <b>Detector</b>             | K2               |               |               | K3      |               |
| <b>Pixel Size (Å/pixel)</b> | 1.15             | 1.16          |               | 1.14    |               |
| <b>Exposure (s)</b>         | 8                |               |               | 5.273   |               |
| <b>Frame rate (s)</b>       | 0.2              |               |               | 0.12    |               |
| <b>Total electron dose</b>  | 48               |               |               |         |               |
| <b>Defocus Range (µm)</b>   | -1 to -2.5       |               |               |         |               |
| <b>Total Micrographs</b>    | 5897             | 1100          | 704           | 706     | 1781          |
| <b>Total Particles</b>      | 164673           | 170204        | 141281        | 414495  | 181424        |

**Table S1. Related to Figure 3 and Figure 6. Parameters for the cryo-EM data collection.**
